1  
2  
3  
4  
5  
6  
7  
8  
9  
10  
11  
12  
13  
14  
15  
16  
17  
18  
19

**Differential COVID-19 mortality in the United States:  
Patterns, causes and policy implications**

Michael A. Stoto,<sup>1\*†</sup> Samantha Schlageter,<sup>1†</sup> Duccio Gamannossi degl’Innocenti,<sup>2,3</sup> Fabiana Zollo,<sup>3</sup> John D. Kraemer<sup>1</sup>

<sup>1</sup>Department of Health Management and Policy, Georgetown University, Washington DC, USA

<sup>2</sup>Università Cattolica del Sacro Cuore, Milan, Italy

<sup>3</sup>Ca’ Foscari University of Venice, Venice, Italy

**\* Correspondence:**

Michael A. Stoto

[mike.stoto@gmail.com](mailto:mike.stoto@gmail.com)

<sup>†</sup>These authors contributed equally to this work

## 20 **Abstract**

21 A "two Americas" narrative emerged in the summer of 2021: one with high demand for  
22 COVID-19 vaccines, and a second with widespread vaccine hesitancy and opposition to mask  
23 mandates. But our analysis of excess mortality shows that the U.S. has been a divided nation at  
24 least since the start of the pandemic. Through April, 2022, there were 1,335,292 excess deaths  
25 associated with COVID-19, 37% more than reported as such. After the first wave, death rates in  
26 the South were more than double those in the Northeast; 45% of deaths were in the South, with  
27 38% of the population.

28 While some regard vaccination and other measures as matters of personal choice, the  
29 population impact is striking. If every region had the same mortality rate as the lowest regional  
30 rate in each period, more than 418,763 COVID-19 deaths were "avoidable," more than half  
31 (58%) in the South and almost half before vaccines were available. These results show that  
32 population-based COVID-19 policies can still play an important role in protecting those most  
33 vulnerable to severe disease and death and reducing the spread of the virus.

34 This example illustrates the importance of excess mortality measures as part of a  
35 comprehensive surveillance system. Official mortality counts rely on complete recording of  
36 COVID-19 as a cause of death, but COVID-19 deaths are under reported for many reasons.  
37 Indeed, the proportion of COVID-19 deaths reported as such varied markedly over time, and  
38 from 67% in the West to 87% the Northeast. In 2022, some regions cut back on testing making  
39 it harder to see a re-emergence of COVID-19 in those places. More extensive surveillance based  
40 on wastewater testing and other means that do not depend on testing are needed to get a more  
41 accurate picture. Excess mortality estimates are more tenuous years beyond the pre-pandemic  
42 period.

## 43 **Introduction**

44 As analysts seek to understand why COVID-19 mortality in the United States lags behind  
45 other countries (1), the focus has been on differentials in vaccine uptake (2). A narrative of "two  
46 Americas" emerged in the summer of 2021. Some states, especially those that leaned towards  
47 the Democratic party (3), demonstrated a high demand for the COVID-19 vaccine. Other states  
48 resisted vaccines and later opposed mask and vaccine mandates. The second America was  
49 concentrated in Southern states and rural areas, especially those that voted for Donald Trump.  
50 Since then, cases, hospitalizations, and deaths increased dramatically in the second America (4).  
51 This narrative not only shapes how we understand what happened and why, but also influences  
52 analyses of what should, or could, be done to control future outbreaks.

53 In an earlier paper, we found that reality is more complex. Stark regional differences in  
54 COVID-19 mortality existed from the start of the pandemic, both in cases and deaths as well as  
55 testing and vaccine uptake (5). In this paper we extend that analysis into the early months of  
56 2022 and incorporate new regional data on vaccine uptake and mask use. The extended analysis  
57 demonstrates regional patterns in these variables as well in mask use and vaccine uptake  
58 throughout the pandemic.

59 Reported cases, hospitalizations, and deaths are known to be substantial underestimates  
60 depending on test availability, patient and physician awareness and attitudes, hospital resources,  
61 and other factors (6,7). COVID-19 awareness and concern (4,8,9), as well as test availability and  
62 use (10–13), vary markedly during the pandemic and throughout the U.S. We avoid these  
63 problems by focusing on “excess mortality” estimates, which are based on the difference  
64 between total number of deaths experienced in a given week and the number that would have  
65 been expected based on earlier time periods. These methods have been used in the U.S. (14–17),

66 Italy (18), Canada (19) and many other countries. Both the World Health Organization (1) and  
67 the Institute for Health Metrics and Evaluation (20) have used the excess mortality approach to  
68 examine the impact of COVID-19 around the globe. This analysis illustrates the strengths and  
69 weaknesses of excess mortality estimates, and considers their role as part of the public health  
70 surveillance toolbox.

71

## 72 **Materials and Methods**

73 As in our original paper (5), this analysis is based on state-level weekly excess mortality  
74 calculations published by CDC (21). Farrington surveillance algorithms, which use over-  
75 dispersed Poisson generalized linear models with spline terms to model trends in counts,  
76 accounting for seasonality, were implemented for each jurisdiction (states, plus the District of  
77 Columbia and New York City). Further details about these methods have been published by the  
78 CDC (13). Logically, the expected number of deaths should be based on data before the  
79 pandemic, but CDC's most recent excess mortality estimates include part of the pandemic period  
80 in the baseline. Consequently, this analysis is based on the expected mortality forecasts that  
81 CDC published in September 2021, the same dataset we used in our previous paper (5). In  
82 particular, deaths from the CDC dataset published in September 2021 were used to calculate  
83 expected deaths up until September 25, 2021. After this date, we calculated the relative change in  
84 expected deaths in each state between September 2019 and April 2020 and applied this to the  
85 September 2021 to April 2022 timeframe.

86 For the sake of presentation, we have divided the study period into six periods based on  
87 overall U.S. COVID-19 cases and mortality. These periods correspond roughly to the initial

88 phase of the pandemic, the summer of 2020, the Alpha wave, the Spring of 2021, the Delta wave,  
89 and the Omicron wave, and we use these terms as a shorthand to describe the phases.

90 In order to visualize patterns in COVID-19 mortality and risk factors, the results are  
91 presented in the four standard U.S. Census regions (see map in supplemental material). Other *ad*  
92 *hoc* groupings could exaggerate or minimize differences. The states in the Northeast and South  
93 are relatively similar, but there is more internal variation in the West, where California is an  
94 outlier in some periods. The calculations were done by week and state and aggregated by adding  
95 the estimated of excess deaths in each region and time period.

96 “Avoidable mortality” was calculated by assuming that the lowest excess mortality rate  
97 experienced by any region in each period could have been achieved by all regions. Because the  
98 first period was unique we did not include the first period in these calculations, but as a  
99 sensitivity analysis we estimated the numbers of deaths that could have been avoided in Period 1  
100 as one-half of the difference between the actual rates and those in the West, the region with the  
101 lowest excess mortality rate in that period.

102 Vaccination data are calculated by the authors for each of the Census regions based on  
103 the CDC Data Tracker (12). In particular, we calculate (1) the proportion of the population aged  
104 65 and older who are fully vaccinated (i.e. have received two doses of the Pfizer-BioNTech or  
105 Moderna vaccines or 1 dose of the Johnson & Johnson/Janssen vaccine), (2) the proportion of the  
106 population aged 18 to 64 who are fully vaccinated, and (3) the proportion of the fully vaccinated  
107 population aged 65 and older who have received at least one booster dose. Because vaccination  
108 is by its nature cumulative, we present cumulative proportions on three dates: June 26, 2021;  
109 December 4, 2021; and April 30, 2022, the ends of period 4, 5, and 6 respectively.

110 Behavior data for mask use are calculated by the authors using the COVID-19 Trends and  
111 Impact Survey (CTIS) (22). The survey was administered by the Delphi Group at Carnegie  
112 Mellon University in partnership with Facebook and deployed in 13 waves from April 6, 2020,  
113 to June 25, 2022 (see details in supplemental material). The survey participants were sampled  
114 from Facebook users. To obtain a representative sample of the United States population,  
115 Facebook used its own demographic data to calculate statistical weights for each survey  
116 participant (23). As of November 2021, the average daily number of survey responses was about  
117 40,000, and the total number of responses was over 25 million. The survey asked participants  
118 questions about COVID-like symptoms, vaccine acceptance, their behavior (e.g., social  
119 distancing, mask use), mental health, and economic and health impacts of the pandemic on their  
120 life. Here we calculate for each of the Census regions the weekly proportion of individuals  
121 wearing a mask from September 8, 2020 (Period 2) to June 25, 2022 (Period 6). We do so by  
122 combining questions C14 (“In the past 5 days, how often did you wear a mask when in public?”  
123 in Waves 4-7), and C14a (“In the past 7 days, how often did you wear a mask when in public?”  
124 in Waves 8-13).

125

## 126 **Results**

127 Between Jan. 3, 2020 and April 30, 2022, public health officials reported 978,567  
128 COVID-19 deaths in the U.S. According to our calculations, however, the excess mortality  
129 associated with COVID-19 totaled 1,335,292, during that period, 37% more COVID-19 deaths  
130 than reported. As can be seen in Figure 1, there are clear differences among the regions over  
131 time, especially between the Northeast and South.

132

133 **Figure 1. Excess mortality per 100,000 population by week and region, U.S., January 3,**  
134 **2020 – April 30, 2022.** The periods are denoted by vertical lines corresponding to May 30,  
135 2020, Oct. 3, 2020, Feb. 27, 2021, June 26, 2021, and Dec. 4, 2021. Source: authors’  
136 calculations based on CDC data.

137  
138 In the initial wave of the pandemic, before May 30, 2020, deaths in the Northeast  
139 dominated the other regions; subsequently, deaths in this region were lower than in the rest of the  
140 United States. Deaths were relatively high in the South during the summer of 2020 (May 31 –  
141 Oct. 3) and the Delta wave (June 26 – Dec. 4, 2021). The Midwest experienced relatively large  
142 numbers of deaths in the first half of the Alpha wave (Oct. 4, 2020 – Feb. 27, 2021) and the  
143 Omicron wave (Dec. 4, 2021– Apr. 30, 2022).

144 Figure 2 shows that the majority of these deaths were during the Alpha (28%), Delta  
145 (25%), and Omicron (19%) waves. In the initial wave (before May 31, 2020), approximately  
146 56% of deaths were in the Northeast; subsequently, 45% were in the South.

147  
148 **Fig 2. Number of excess deaths by period and region, U.S., January 3, 2020 – April 30,**  
149 **2022.** The height of each bar represents the total U.S. excess deaths in each period and the  
150 colored sections represent the number of excess deaths in each region during the period. Periods  
151 are defined as follows: Period 1 (January 3 to May 30, 2020), Period 2 (May 31 – October 3,  
152 2020), Period 3 (October 4, 2020 to February 27, 2021), Period 4 (February 28 to June 26, 2021),  
153 Period 5 (June 27 to December 4, 2021), and Period 6 (December 5, 2021 to April 30, 2022).  
154 Source: authors’ calculations based on CDC data.

155

156 Table 1 displays excess mortality rates per 100,000 population per day by region and  
 157 period. Before May 31, 2020, the daily mortality rate in the Northeast (0.888 per 100,000) was  
 158 3.2 times the national rate while the rate for the South (0.134 per 100,000) was 0.49 times the  
 159 national rate. Subsequently, the South experienced COVID-19 mortality 3% to 46% higher than  
 160 the national rate, whereas the Northeast's rate was 11% to 70% lower.

161 **Table 1. Excess and avoidable mortality by region and time period, U.S., January 3, 2020 –**  
 162 **April 30, 2022**

|                                                                             | <i>Period 1</i><br>(1/3–<br>5/30/20) | <i>Period 2</i><br>(5/31–<br>10/3/20) | <i>Period 3</i><br>(10/4/20–<br>2/27/21) | <i>Period 4</i><br>(2/28–<br>6/26/21) | <i>Period 5</i><br>(6/27–<br>12/4/21) | <i>Period 6</i><br>(12/5/21–<br>4/30/22) | <i>Entire<br/>period</i> |
|-----------------------------------------------------------------------------|--------------------------------------|---------------------------------------|------------------------------------------|---------------------------------------|---------------------------------------|------------------------------------------|--------------------------|
| <i>Excess mortality by region and period</i>                                |                                      |                                       |                                          |                                       |                                       |                                          |                          |
| Midwest                                                                     | 22,367                               | 23,212                                | 82,676                                   | 13,883                                | 62,749                                | 71,674                                   | 276,561                  |
| Northeast                                                                   | 75,216                               | 8,029                                 | 48,243                                   | 11,457                                | 31,785                                | 36,848                                   | 211,578                  |
| South                                                                       | 24,886                               | 85,453                                | 148,191                                  | 43,410                                | 164,827                               | 101,655                                  | 568,422                  |
| West                                                                        | 12,206                               | 36,986                                | 89,608                                   | 15,064                                | 76,727                                | 49,141                                   | 279,732                  |
| U.S.                                                                        | 134,675                              | 153,680                               | 368,718                                  | 83,814                                | 336,088                               | 259,317                                  | 1,336,292                |
| <i>Excess mortality per 100,000 population per day by region and period</i> |                                      |                                       |                                          |                                       |                                       |                                          |                          |
| Midwest                                                                     | 0.221                                | 0.267                                 | 0.815                                    | 0.169                                 | 0.565                                 | 0.707                                    | 0.473                    |
| Northeast                                                                   | 0.888                                | 0.111                                 | 0.570                                    | 0.167                                 | 0.343                                 | 0.435                                    | 0.434                    |
| South                                                                       | 0.134                                | 0.537                                 | 0.798                                    | 0.289                                 | 0.811                                 | 0.548                                    | 0.531                    |
| West                                                                        | 0.106                                | 0.374                                 | 0.776                                    | 0.161                                 | 0.606                                 | 0.425                                    | 0.420                    |
| U.S.                                                                        | 0.276                                | 0.368                                 | 0.757                                    | 0.212                                 | 0.630                                 | 0.532                                    | 0.476                    |
| <i>Excess mortality as a proportion of reported COVID-19 deaths</i>         |                                      |                                       |                                          |                                       |                                       |                                          |                          |
| Midwest                                                                     | 85%                                  | 61%                                   | 93%                                      | 98%                                   | 60%                                   | 65%                                      | 75%                      |
| Northeast                                                                   | 83%                                  | 101%                                  | 105%                                     | 127%                                  | 56%                                   | 83%                                      | 87%                      |
| South                                                                       | 79%                                  | 67%                                   | 84%                                      | 62%                                   | 66%                                   | 61%                                      | 70%                      |
| West                                                                        | 76%                                  | 57%                                   | 84%                                      | 67%                                   | 52%                                   | 62%                                      | 67%                      |
| U.S.                                                                        | 82%                                  | 66%                                   | 89%                                      | 78%                                   | 61%                                   | 66%                                      | 73%                      |
| <i>Avoidable excess mortality by region and period</i>                      |                                      |                                       |                                          |                                       |                                       |                                          |                          |
| Midwest                                                                     | -                                    | 13,597                                | 24,906                                   | 164                                   | 24,687                                | 27,550                                   | 90,904                   |
| Northeast                                                                   | -                                    | 0                                     | 0                                        | 414                                   | 0                                     | 825                                      | 0                        |
| South                                                                       | -                                    | 67,855                                | 42,453                                   | 18,299                                | 95,162                                | 20,893                                   | 244,663                  |
| West                                                                        | -                                    | 26,033                                | 23,796                                   | 0                                     | 33,367                                | 0                                        | 83,196                   |
| U.S.                                                                        | -                                    | 107,486                               | 91,156                                   | 18,877                                | 153,215                               | 49,268                                   | 418,763                  |

163



164 Table 1 also shows how the ratio of estimated to reported COVID-19 deaths varies  
165 among the regions over time. The West (67%) and South (70%) report the lowest fraction. In  
166 Period 1 the proportions were similar in all regions (approximately 82%), but they vary markedly  
167 afterward, in particular dropping to less than 60% in the West in some periods. The overall  
168 proportion is highest in the Northeast (87%). The proportion is greater than 100% in some  
169 periods, probably because some people who died of another primary cause had a positive  
170 COVID-19 test and were included in the reported counts (14), as called for by the National  
171 Center for Health Statistics (24). A recent analysis attributed the more accurate coding of  
172 COVID-19 deaths in the New England states (which are in the Northeast region) to well-run and  
173 funded public health departments, excellent hospitals, and state medical examiners who ensure  
174 death certificate information is both accurate and timely (25). The report also noted that some  
175 states in the region had large increases in deaths from overdoses rather than COVID-19,  
176 indicating a weakness of the excess mortality approach.

177 Because the rates of excess mortality vary so markedly, one can calculate how many  
178 deaths could have been avoided if each region had the same rates as the lowest region in each  
179 time period, a standard demographic calculation. We assume that no deaths were avoidable in  
180 the first period, before much was known about treating or preventing COVID-19. Subsequently,  
181 we counted as “avoidable” the difference between the actual rates and the lowest regional rate in  
182 each period. This calculation indicates that 418,763 COVID-19 deaths were avoidable. As can  
183 be seen in Figure 3, more than half of these avoidable deaths (58%) were in the South. Almost  
184 half (47%) occurred during the Alpha wave and the summer before it, that is between May 31,  
185 2020 and February, 2021. A similar number (48%) occurred during the Delta and Omicron  
186 waves, between June 27, 2021 and April 30, 2022.

187 **Fig 3. Number of avoidable deaths by period and region, U.S., January 3, 2020 – April 30,**  
188 **2022.** The height of each bar represents the total U.S. avoidable deaths in each period and the  
189 colored sections represent the number of avoidable deaths in each region during the period.  
190 Periods defined as in Figure 2. Source: authors' calculations based on CDC data.

191  
192 The initial wave was excluded from the avoidable mortality calculations because one  
193 might argue that too little was known at this time about how to prevent transmission. As a  
194 sensitivity analysis, we calculated the number of avoidable deaths in Period 1 as one-half of the  
195 difference between the actual rates and those in region with lowest excess mortality rate in that  
196 period. With this assumption the proportion of avoidable deaths in the South was still high,  
197 54%, and the total avoidable deaths increases to 461,600.

198  
199 **Discussion**

200 *Policy implications*

201 Experiencing well over one million COVID-19 deaths places the United States in a  
202 category with Russia, Brazil, and Mexico (20). The real tragedy, however, is the clear regional  
203 differences within the country, suggesting that over 400,000 of these deaths could have been  
204 avoided. This regional variation, however, also demonstrates the potential impact of population-  
205 oriented preventive strategies and other lessons for how the country proceeds in 2022.

206 The theme of "two Americas" arose in the summer of 2021. At first, the focus was  
207 vaccine refusal; later it expanded to opposition to vaccine and mask mandates, and Covid  
208 denialism. This pattern was strongest in the South and in states with Republican governors  
209 (3,26,27). Using the proportion voting for Donald Trump as a proxy for partisanship, journalistic

210 analyses found consistently higher vaccination rates and lower COVID-19 mortality in  
211 Northeastern states, which are predominantly Democratic, and the opposite in Southern states,  
212 which are predominantly Republican (4,8,9). But there are other geographic differences in age  
213 distribution, racial and ethnic proportions, education levels, and other matters that can be  
214 confounding factors (28).

215         However, rather than starting in the summer of 2021, this analysis demonstrates that large  
216 disparities have existed since the beginning of the pandemic. The starkest contrast is between  
217 the Northeast and South. In the first use of excess mortality estimates, Woolf and colleagues  
218 (15) showed that the first wave of the pandemic was highly concentrated in the Northeast, and  
219 particularly in the New York metropolitan area. After the first wave, however, the South, which  
220 makes up 38% of the population experienced approximately 45% of all excess deaths. The  
221 disparity was most apparent in the summer of 2020, when the daily excess mortality rates were  
222 0.537 per 100,000 in the South and 0.111 per 100,000 in the Northeast. Similarly, the majority  
223 (58%) of avoidable COVID-19 deaths between May 31, 2020 and April 30, 2022 were in the  
224 South.

225         Nationally, vaccines have already saved many lives (29) and boosters have the potential  
226 to save many more (30). However, our analysis demonstrates that more than half (52%) of the  
227 avoidable deaths occurred by the end of February, 2021, when the vaccine rollout was just  
228 beginning. Weather is not a likely explanation because the South has had dramatically higher  
229 COVID-19 mortality than the Northeast since June, 2020 during all seasons of the year.  
230 Northeasterners may have had higher levels of natural immunity after the first wave (31), but by  
231 July, 2020, there were substantially higher seroprevalence rates in the South (37.9%) than in the  
232 Northeast (17.5%) (32), so natural immunity cannot explain the large differences starting in the

233 summer of 2020. These results suggest, therefore, that the higher excess COVID-19 mortality in  
234 the South and other areas of the country is likely to be due at least in part to higher transmission  
235 resulting from differences in mask use, social distancing, and other behaviors. The behavioral  
236 survey data in Figure 4 show clear regional differences in the proportion of Americans who wore  
237 masks in public all or most of the time during the Alpha wave. The Northeast and West, which  
238 had the highest mask utilization rates, had the lowest mortality rates; the opposite was true in the  
239 Midwest and South. These differences in mask use remained throughout the study period. The  
240 data on individuals working outside the home and avoiding contact with others is less clear cut  
241 (see supplemental material). These differences were not attributed to “lockdowns,” which only  
242 really characterized the U.S. response in the initial wave. Anecdotal reports suggest strong  
243 regional differences whether and when restrictions on public gatherings were lifted (33,34).

244

245 **Figure 4. Mask use by period and region, U.S., September 8, 2020 – April 30, 2022.**

246 Proportion of survey respondents reporting that they wear a mask in public all or most of the  
247 time. Periods defined as in Figure 2. Source: authors' calculations of Delphi US CTIS survey  
248 (see supplemental material).

249

250 These behavioral differences could be due to variation in state policies, social attitudes  
251 (e.g. regarding “freedom), trust in state and local public health and elected officials, and what  
252 these officials said during the pandemic. One analysis found that trust in the federal government  
253 was associated with people taking less protective steps (likely because the Trump Administration  
254 was undermining control measures during the study period). However, trust in state governments

255 was generally associated with more protective steps, albeit with a complex interaction between  
256 individuals' political affiliation and the party in control of the state government (35).

257 Regional differences could be partially unrelated to the pandemic. For instance, the  
258 Southern states have for many years had higher health risks such as obesity, lower quality health  
259 care, and worse health outcomes, and these may have contributed to the observed disparities  
260 (16). Sorting out the relative contributions of these factors is beyond the scope of this analysis,  
261 which documents the existence of regional differences in COVID-19 mortality and potentially  
262 related factors. Calculating excess mortality by state (as opposed to region) as we do in this  
263 analysis at least partially controls for persistent differences among states in these factors.

264 In addition, this analysis translates the correlations between outcomes and potential  
265 explanatory factors that dominate both the media and scientific report into concrete numbers of  
266 deaths that could have been avoided. Starting in the summer of 2021, strong regional differences  
267 emerged in vaccine uptake. Figure 5 shows that, 77% of the population aged 65 and older were  
268 fully vaccinated, ranging from 75% in the South to 81% in the Northeast in June 2021. This  
269 proportion increased to 90% overall (88% to 94% across regions) in April, 2022. The proportion  
270 of those aged 18–64 years who were fully vaccinated was both lower throughout this period, and  
271 varied more among the regions. In June 2021 the regional rates ranged from 44% in the South to  
272 61% in the Northeast. Almost a year later (April 2022) the corresponding rates were 67% in the  
273 South to 82% in the Northeast. Boosters were not available in June 2021, but in the U.S. the  
274 proportion of the fully-vaccinated population aged 65 and older who had at least one booster  
275 grew from 41% in December 2021 to April 2022. As with the other vaccine figures, the South  
276 lagged behind (37% in December 2021 and 55% in April 2022), but subsequently the Midwest  
277 rather than the Northeast had the highest booster coverage rates.

278 **Figure 5. Vaccination uptake by region, U.S., June 26, 2021; December 4, 2021; and April**  
279 **30, 2022.** (1) the proportion of the population aged 65 and older who are fully vaccinated (i.e.  
280 have received two doses of the Pfizer-BioNTech or Moderna vaccines or 1 dose of the  
281 J&J/Jansen vaccine), (2) the proportion of the population aged 18 to 64 and older who are fully  
282 vaccinated, and (3) the proportion of the fully vaccinated population aged 65 and older who have  
283 received at least one booster dose. Source: authors' calculations based on CDC data.

284

285         Consequently, regional differences in vaccination likely had a greater impact on mortality  
286 during the Delta and Omicron waves (June 27, 2021 – April 30, 2022) than earlier. The vast  
287 majority of COVID-19 deaths occur among those aged 65 and older. The proportion of this age  
288 group who were fully vaccinated was generally high in all regions, but by late 2021 in the face of  
289 the Omicron variant, this protection likely waned, and regional differences in booster rates led to  
290 more avoidable deaths, particularly in the South. COVID-19 mortality rates are lower in younger  
291 adults, but differences in vaccine coverage rates (from 62% in the South to 76% in the Northeast  
292 in December 2021) probably also contributed to differences in avoidable mortality. In addition,  
293 although vaccination does not completely prevent infections it does lower the risk (36,37), so  
294 differences in vaccine uptake probably added to the impact of non-pharmaceutical interventions  
295 in slowing the spread of the virus in some regions. These differences consequently increased the  
296 number of high-risk individuals who were infected, hospitalized, and died.

297         As we write this in the summer of 2022, many are asking when “Covid will be over.”  
298 However, with vaccine and booster coverage lagging, especially in rural areas and the regions of  
299 the United States that have experienced high COVID-19 mortality, there is still a need for  
300 comprehensive, population-based pandemic policies, such as wearing masks in crowded closed

301 spaces. The 2020-style lockdowns are no longer appropriate, but our analysis shows that the less-  
302 restrictive measures adopted since the summer of 2020, especially in the Northeast, can still play  
303 important roles in protecting those who are most vulnerable to severe disease and death and in  
304 reducing the spread of the virus.

305

### 306 *Excess mortality estimates as a component of the surveillance toolbox*

307 Since it emerged in 2020, COVID-19 has played out differently across the country.  
308 Beyond the regional differences that are the focus of this paper, there are substantial differences  
309 between rural and urban areas with states and among socio-demographic groups (16,38,39).  
310 Because they are less sensitive to differences in reporting patterns than case counts, this analysis  
311 illustrates how excess mortality methods can be especially useful in understanding these patterns  
312 (40). It also shows the importance of going beyond cumulative case counts for the U.S. as a  
313 whole that dominate the news cycle.

314 During the Omicron wave, some observers noted that people were dying “with Covid but  
315 not from Covid.” The claim was that testing had become so common that many people who  
316 were gravely ill and dying of another cause were included in the COVID-19 deaths counts  
317 (41,42). The excess mortality data helps to falsify this claim. While some of the observed  
318 mortality may be deaths not directly attributable to COVID-19, the spike in excess deaths  
319 beyond what would have been expected in previous years shows that there were substantial  
320 numbers of deaths attributable to the pandemic. That observed deaths were concentrated  
321 disproportionately among unvaccinated individuals also tends to support this argument: while  
322 unvaccinated individuals may take more risks in general, it is hard to imagine that they only  
323 drive increasingly recklessly or suffer heart attacks more only when omicron is circulating.

324 While they cannot explain *why* some regions had different mortality rates, excess  
325 mortality estimates are simple and straightforward compared to estimates based on  
326 epidemiologic models, and can accurately document *when and where* COVID-19 occurred. In  
327 addition, although causal patterns are complex and difficult to ascertain, differential  
328 implementation of and adherence to stay-at-home orders, mask use, and other non-  
329 pharmaceutical interventions seem to be at least a partial explanation for the regional differences  
330 in COVID-19 mortality. Thus, our analysis demonstrates the potential impact of population-  
331 based restrictions as well as vaccines, suggesting that a comprehensive COVID-19 policy is  
332 needed to control future pandemics.

333 What this analysis does *not* show is what drives these policy and behavioral changes. For  
334 instance, in the summer of 2020, some suggested that state and regional political factors were  
335 driving decisions about reopening (43,44). A year later, the same factors drove differences in  
336 vaccine uptake (27). Krieger and colleagues (45) suggest that political ideologies of elected  
337 representatives drive COVID-19 outcomes. Others have pointed to regional variation in social  
338 capital (46,47). Woolf, on the other hand, argues that state mortality differentials during the  
339 pandemic simply continue a decades-long trend in political differences between Republican and  
340 Democratic dominated states (48) and will continue until the root causes of mortality  
341 differentials are addressed (16).

342 Our analysis also illustrates the importance of analyzing excess mortality (and other  
343 COVID-19 data) at the appropriate spatial and temporal scale. With data on cases,  
344 hospitalizations, and deaths available on a daily basis for small geographic areas (there are  
345 ~3,000 counties in the U.S.), national patterns can be difficult to see. Add to that multiple and  
346 highly variable public health policies and individual behavior changes, assessing the impact of



347 non-pharmaceutical interventions and vaccination campaigns is challenging. Our relatively  
348 high-level analysis (four geographical regions and six time periods over two years), has a  
349 number of benefits. There have been many studies of the impact of NPIs, but they are limited to  
350 a particular context and type of intervention, and by the ability to draw causal conclusions from  
351 observational data. Our “big-picture” analysis provides a sense of the scale of NPIs actual and  
352 potential impact.

353 The regional level of analysis we employed strikes a balance between simplicity and  
354 objectivity. It is simple enough for disparities to be clearly apparent, but masks more extreme  
355 disparities at the state and local levels. For instance, Ackley and colleagues (14) and Paglino and  
356 colleagues (49) both found similar regional patterns to this analysis, but additional differences in  
357 urban and rural areas. Lundberg and colleagues found racial and ethnic differences in both  
358 excess mortality and vaccination acceptance (50). Controlling for demographic characteristics  
359 and social determinants likely to influence COVID-19 transmission and outcomes using state  
360 fixed effects, Sehgal and others found strong associations between county-level Republican vote  
361 share and county-level COVID-19, suggesting that mortality that county-level voting behavior  
362 may act as a proxy for compliance with and support of public health measures that would protect  
363 residents from COVID-19 (51). These statistics, however, depend on test availability, clinical  
364 decisions, and reporting processes that can lead to under- and over- counting. In particular, this  
365 analysis shows that the ratio of estimated to reported COVID-19 deaths ranged from 127%  
366 (Northeast in period 4) to 52% in the West in Period 5. Thus, the disparities in these analyses are  
367 likely underestimates of actual differences at finer levels of geography.

368 There are, of course, limitations to excess mortality methods. In particular, methods  
369 depend on estimates of what mortality rates would have been in the absence of the pandemic.

370 There are many ways of making these estimates, some more appropriate than others (52).  
371 Furthermore, as time goes on, the fundamental assumption that deaths in excess of previous  
372 trends are “caused” by the pandemic becomes more tenuous. For example, the death of someone  
373 who couldn’t get to an emergency department while experiencing a heart attack in New York  
374 City in April 2020 can reasonably be attributed to the pandemic. An opioid overdose in a rural  
375 area in April 2022 might be attributed to despair to which the pandemic – and the response to it –  
376 contributed, but it is harder to say caused it. As we go further beyond the base period the  
377 reliability of these methods will decline.

378 Excess mortality estimates are limited as real-time surveillance tools. For instance,  
379 reporting delays can be greater in some areas than others. Therefore excess mortality estimates  
380 and differentials are not reliable for a period of weeks until data are uniformly compiled. On the  
381 other hand, hospitalizations and reported COVID-19 deaths lag infections by weeks, and case  
382 counts are subject to reporting delays and day-of-the-week effects as well as undercounting.  
383 Nevertheless, excess mortality estimates can be a valuable component of a comprehensive  
384 surveillance strategy for COVID-19 and other diseases, providing useful information on medium  
385 to long term trends – weeks to months.

386 As some regions cut back on testing because of the sense that the pandemic is “over,”  
387 undercounts of deaths — and likely cases and hospitalizations as well — will make it harder to  
388 see a re-emergence of COVID-19, particularly BA.5, BA.4.6 and other variants, in those regions.  
389 More extensive surveillance based on wastewater testing, seroprevalence surveys, and other  
390 means that do not depend on the availability of test sites (53) and individuals’ decisions to be  
391 tested is clearly needed to get a more accurate sense of what is happening. Two and a half years  
392 into the pandemic, the challenges of predicting expected mortality invalidate excess mortality

393 estimates as real-time surveillance measures, but they can still be useful for retrospective  
394 analyses of trends in the pandemic, and the effect of control measures, at the appropriate  
395 geographic, socio-demographic, and political scale.

396

### 397 **Acknowledgments**

398 This research is based in part on survey results from Carnegie Mellon University's Delphi  
399 Group. FZ thanks the IRIS Coalition (UK Government, no. SCH-00001-3391). The authors are  
400 grateful to Katrina Dolendo for editorial assistance.

401

### 402 **References**

- 403 1. Branswell H. WHO: Nearly 15 million died as a result of Covid-19 in first two years of  
404 pandemic [Internet]. STAT. 2022 [cited 2022 Nov 15]. Available from:  
405 [https://www.statnews.com/2022/05/05/who-nearly-15-million-died-as-a-result-of-covid-19-](https://www.statnews.com/2022/05/05/who-nearly-15-million-died-as-a-result-of-covid-19-in-first-two-years-of-pandemic/)  
406 [in-first-two-years-of-pandemic/](https://www.statnews.com/2022/05/05/who-nearly-15-million-died-as-a-result-of-covid-19-in-first-two-years-of-pandemic/)
- 407 2. Baumgaertner E. Here's how the most- and least-vaccinated states fared against the Delta  
408 variant. Los Angeles Times [Internet]. 2021 Sep 20 [cited 2022 Jan 9]; Available from:  
409 [https://www.latimes.com/world-nation/story/2021-09-20/heres-how-the-most-and-least-](https://www.latimes.com/world-nation/story/2021-09-20/heres-how-the-most-and-least-vaccinated-states-fared-against-the-delta-variant)  
410 [vaccinated-states-fared-against-the-delta-variant](https://www.latimes.com/world-nation/story/2021-09-20/heres-how-the-most-and-least-vaccinated-states-fared-against-the-delta-variant)
- 411 3. Krugman P. How Covid Became a Red-State Crisis. The New York Times [Internet]. 2021  
412 Jul 29 [cited 2022 Jan 9]; Available from:  
413 <https://www.nytimes.com/2021/07/29/opinion/covid-vaccinations-republicans.html>

- 414 4. Leonhardt D. U.S. Covid Deaths Get Even Redder. The New York Times [Internet]. 2021  
415 Nov 8 [cited 2022 Jan 9]; Available from:  
416 <https://www.nytimes.com/2021/11/08/briefing/covid-death-toll-red-america.html>
- 417 5. Stoto MA, Schlageter S, Kraemer JD. COVID-19 mortality in the United States: It's been  
418 two Americas from the start. PLOS ONE. 2022 Apr 28;17(4):e0265053.
- 419 6. National Academies of Sciences, Engineering, and Medicine. Evaluating Data Types: A  
420 Guide for Decision Makers using Data to Understand the Extent and Spread of COVID-19  
421 [Internet]. Washington, DC: The National Academies Press; 2020 [cited 2022 Jan 9]. 15 p.  
422 Available from: [https://www.nap.edu/catalog/25826/evaluating-data-types-a-guide-for-](https://www.nap.edu/catalog/25826/evaluating-data-types-a-guide-for-decision-makers-using-data)  
423 [decision-makers-using-data](https://www.nap.edu/catalog/25826/evaluating-data-types-a-guide-for-decision-makers-using-data)
- 424 7. Fricker Jr RD. Covid-19: One year on.... Significance. 2021;18(1):12–5.
- 425 8. Bump P. Those least likely to worry about getting covid (Republicans) have been those most  
426 likely to get covid. Washington Post [Internet]. 2022 Jan 20 [cited 2022 Mar 12]; Available  
427 from: [https://www.washingtonpost.com/politics/2022/01/20/those-least-likely-worry-about-](https://www.washingtonpost.com/politics/2022/01/20/those-least-likely-worry-about-getting-covid-republicans-have-been-those-most-likely-get-covid/)  
428 [getting-covid-republicans-have-been-those-most-likely-get-covid/](https://www.washingtonpost.com/politics/2022/01/20/those-least-likely-worry-about-getting-covid-republicans-have-been-those-most-likely-get-covid/)
- 429 9. Wood D, Brumfiel G. Pro-Trump counties now have far higher COVID death rates.  
430 Misinformation is to blame. NPR [Internet]. 2021 Dec 5 [cited 2022 Mar 12]; Available  
431 from: [https://www.npr.org/sections/health-shots/2021/12/05/1059828993/data-vaccine-](https://www.npr.org/sections/health-shots/2021/12/05/1059828993/data-vaccine-misinformation-trump-counties-covid-death-rate)  
432 [misinformation-trump-counties-covid-death-rate](https://www.npr.org/sections/health-shots/2021/12/05/1059828993/data-vaccine-misinformation-trump-counties-covid-death-rate)
- 433 10. Tingley K. Counting Covid-19 Cases Doesn't Capture the Pandemic's Impact. The New  
434 York Times [Internet]. 2022 Jan 26 [cited 2022 Mar 12]; Available from:  
435 <https://www.nytimes.com/2022/01/26/magazine/covid-19-data-public-health.html>

- 436 11. Kasakove S. As At-Home Tests Surge, Doubts Rise About Accuracy of Public Covid  
437 Counts. The New York Times [Internet]. 2021 Dec 30 [cited 2022 Mar 12]; Available from:  
438 <https://www.nytimes.com/2021/12/30/us/at-home-rapid-covid-tests-cases.html>
- 439 12. Centers for Disease Control and Prevention. COVID Data Tracker [Internet]. Centers for  
440 Disease Control and Prevention. 2020 [cited 2022 Nov 15]. Available from:  
441 <https://covid.cdc.gov/covid-data-tracker>
- 442 13. Sanmarchi F, Golinelli D, Lenzi J, Esposito F, Capodici A, Reno C, et al. Exploring the Gap  
443 Between Excess Mortality and COVID-19 Deaths in 67 Countries. JAMA Netw Open. 2021  
444 Jul 16;4(7):e2117359.
- 445 14. Ackley CA, Lundberg DJ, Ma L, Elo IT, Preston SH, Stokes AC. County-level estimates of  
446 excess mortality associated with COVID-19 in the United States. SSM - Popul Health. 2022  
447 Mar 1;17:101021.
- 448 15. Woolf SH, Chapman DA, Sabo RT, Zimmerman EB. Excess Deaths From COVID-19 and  
449 Other Causes in the US, March 1, 2020, to January 2, 2021. JAMA. 2021 May  
450 4;325(17):1786–9.
- 451 16. Woolf SH. Excess Deaths Will Continue In The United States Until The Root Causes Are  
452 Addressed. Health Aff (Millwood). 2022 Nov;41(11):1562–4.
- 453 17. Weinberger DM, Chen J, Cohen T, Crawford FW, Mostashari F, Olson D, et al. Estimation  
454 of Excess Deaths Associated With the COVID-19 Pandemic in the United States, March to  
455 May 2020. JAMA Intern Med. 2020 Oct 1;180(10):1336–44.
- 456 18. Gibertoni D, Adja KYC, Golinelli D, Reno C, Regazzi L, Lenzi J, et al. Patterns of COVID-  
457 19 related excess mortality in the municipalities of Northern Italy during the first wave of the  
458 pandemic. Health Place. 2021 Jan;67:102508.

- 459 19. McGrail K. Excess mortality, COVID-19 and health care systems in Canada. *CMAJ*. 2022  
460 May 30;194(21):E741–5.
- 461 20. COVID-19 Excess Mortality Collaborators. Estimating excess mortality due to the COVID-  
462 19 pandemic: a systematic analysis of COVID-19-related mortality, 2020–21. *The Lancet*.  
463 2022 Apr 16;399(10334):1513–36.
- 464 21. Centers for Disease Control and Prevention. Excess Deaths Associated with COVID-19  
465 [Internet]. 2022 [cited 2022 Nov 15]. Available from:  
466 [https://www.cdc.gov/nchs/nvss/vsrr/covid19/excess\\_deaths.htm](https://www.cdc.gov/nchs/nvss/vsrr/covid19/excess_deaths.htm)
- 467 22. Salomon JA, Reinhart A, Bilinski A, Chua EJ, La Motte-Kerr W, Rönn MM, et al. The US  
468 COVID-19 Trends and Impact Survey: Continuous real-time measurement of COVID-19  
469 symptoms, risks, protective behaviors, testing, and vaccination. *Proc Natl Acad Sci*. 2021  
470 Dec 21;118(51):e2111454118.
- 471 23. Data for Good. User Guide for the COVID-19 Trends and Impact Survey Weights [Internet].  
472 2022 [cited 2022 Nov 15]. Available from:  
473 <https://dataforgood.facebook.com/dfg/resources/user-guide-for-ctis-weights>
- 474 24. National Vital Statistics System. Guidance for Certifying Deaths Due to Coronavirus Disease  
475 2019 (COVID–19). *Vital Stat Report Guid* [Internet]. 2020 Apr;3. Available from:  
476 <https://www.cdc.gov/nchs/data/nvss/vsrg/vsrg03-508.pdf>
- 477 25. Barndollar H. How New England caught the COVID deaths much of the country missed.  
478 *The Providence Journal* [Internet]. 2022 Feb 24 [cited 2022 Mar 12]; Available from:  
479 [https://www.providencejournal.com/story/news/2022/02/24/covid-death-toll-cause-accurate-](https://www.providencejournal.com/story/news/2022/02/24/covid-death-toll-cause-accurate-new-england-medical-examiner-nursing-homes/9132115002/)  
480 [new-england-medical-examiner-nursing-homes/9132115002/](https://www.providencejournal.com/story/news/2022/02/24/covid-death-toll-cause-accurate-new-england-medical-examiner-nursing-homes/9132115002/)

- 481 26. Rubin J. We're becoming two Americas: One healthy, one deliberately at risk. Washington  
482 Post [Internet]. 2021 Jul 19 [cited 2022 Jan 9]; Available from:  
483 [https://www.washingtonpost.com/opinions/2021/07/19/two-americans-one-healthy-one-](https://www.washingtonpost.com/opinions/2021/07/19/two-americans-one-healthy-one-deliberately-risk/)  
484 [deliberately-risk/](https://www.washingtonpost.com/opinions/2021/07/19/two-americans-one-healthy-one-deliberately-risk/)
- 485 27. Jarvie J. One nation, divisible — over vaccines. Los Angeles Times [Internet]. 2021 [cited  
486 2022 Jan 9]; Available from:  
487 [https://enewspaper.latimes.com/infinity/article\\_share.aspx?guid=34b29cc1-f8bf-4da9-82b8-](https://enewspaper.latimes.com/infinity/article_share.aspx?guid=34b29cc1-f8bf-4da9-82b8-282102286176)  
488 [282102286176](https://enewspaper.latimes.com/infinity/article_share.aspx?guid=34b29cc1-f8bf-4da9-82b8-282102286176)
- 489 28. Shamus K, Tanner K. Age, education, voting for Trump associated with higher COVID-19  
490 death rates in Michigan. Detroit Free Press [Internet]. 2022 Feb 23 [cited 2022 Mar 12];  
491 Available from: [https://www.freep.com/story/news/health/2022/03/11/michigan-covid-19-](https://www.freep.com/story/news/health/2022/03/11/michigan-covid-19-death-rates-county-education-age-trump/6924307001/)  
492 [death-rates-county-education-age-trump/6924307001/](https://www.freep.com/story/news/health/2022/03/11/michigan-covid-19-death-rates-county-education-age-trump/6924307001/)
- 493 29. Schneider E, Shah A, Sah P, Moghadas S, Vilches T, Galvani A. The U.S. COVID-19  
494 Vaccination Program at One Year: How Many Deaths and Hospitalizations Were Averted?  
495 [Internet]. The Commonwealth Fund. 2021 [cited 2022 Jan 9]. Available from:  
496 [https://www.commonwealthfund.org/publications/issue-briefs/2021/dec/us-covid-19-](https://www.commonwealthfund.org/publications/issue-briefs/2021/dec/us-covid-19-vaccination-program-one-year-how-many-deaths-and)  
497 [vaccination-program-one-year-how-many-deaths-and](https://www.commonwealthfund.org/publications/issue-briefs/2021/dec/us-covid-19-vaccination-program-one-year-how-many-deaths-and)
- 498 30. Schneider E, Shah A, Sah P, Moghadas S, Vilches T, Galvani A. Responding to Omicron:  
499 Aggressively Increasing Booster Vaccinations Now Could Prevent Many Hospitalizations  
500 and Deaths [Internet]. Commonwealth Fund. [cited 2022 Jan 9]. Available from:  
501 <https://www.commonwealthfund.org/blog/2022/responding-omicron>

- 502 31. Havers FP, Reed C, Lim T, Montgomery JM, Klena JD, Hall AJ, et al. Seroprevalence of  
503 Antibodies to SARS-CoV-2 in 10 Sites in the United States, March 23-May 12, 2020. *JAMA*  
504 *Intern Med*. 2020 Dec 1;180(12):1576–86.
- 505 32. Anand S, Montez-Rath M, Han J, Bozeman J, Kerschmann R, Beyer P, et al. Prevalence of  
506 SARS-CoV-2 antibodies in a large nationwide sample of patients on dialysis in the USA: a  
507 cross-sectional study. *Lancet Lond Engl*. 2020 Oct 24;396(10259):1335–44.
- 508 33. Leatherby L. Why Are Coronavirus Cases Decreasing? Experts Say Restrictions Are  
509 Working. *The New York Times* [Internet]. 2020 Aug 24 [cited 2022 Nov 15]; Available  
510 from: [https://www.nytimes.com/interactive/2020/08/24/us/coronavirus-cases-](https://www.nytimes.com/interactive/2020/08/24/us/coronavirus-cases-decreasing.html)  
511 [decreasing.html](https://www.nytimes.com/interactive/2020/08/24/us/coronavirus-cases-decreasing.html)
- 512 34. Barnes R, Hawkins D. Rush to reopen led to spikes in cases that threaten to overwhelm  
513 hospitals in some states, officials say. *Washington Post* [Internet]. 2020 Jul 6 [cited 2022  
514 Nov 15]; Available from: [https://www.washingtonpost.com/national/rushed-reopening-led-](https://www.washingtonpost.com/national/rushed-reopening-led-to-case-spikes-that-threaten-to-overwhelm-hospitals-in-some-states/2020/07/05/c936bd16-beea-11ea-9fdd-b7ac6b051dc8_story.html)  
515 [to-case-spikes-that-threaten-to-overwhelm-hospitals-in-some-states/2020/07/05/c936bd16-](https://www.washingtonpost.com/national/rushed-reopening-led-to-case-spikes-that-threaten-to-overwhelm-hospitals-in-some-states/2020/07/05/c936bd16-beea-11ea-9fdd-b7ac6b051dc8_story.html)  
516 [beea-11ea-9fdd-b7ac6b051dc8\\_story.html](https://www.washingtonpost.com/national/rushed-reopening-led-to-case-spikes-that-threaten-to-overwhelm-hospitals-in-some-states/2020/07/05/c936bd16-beea-11ea-9fdd-b7ac6b051dc8_story.html)
- 517 35. Suhay E, Soni A, Persico C, Marcotte D. Americans’ Trust in Government and Health  
518 Behaviors during the COVID-19 Pandemic. Forthcoming in *RSF: The Russell Sage*  
519 *Foundation Journal of the Social Sciences*;
- 520 36. Johnson AG. COVID-19 Incidence and Death Rates Among Unvaccinated and Fully  
521 Vaccinated Adults with and Without Booster Doses During Periods of Delta and Omicron  
522 Variant Emergence — 25 U.S. Jurisdictions, April 4–December 25, 2021. *MMWR Morb*  
523 *Mortal Wkly Rep* [Internet]. 2022 [cited 2022 Nov 15];71. Available from:  
524 <https://www.cdc.gov/mmwr/volumes/71/wr/mm7104e2.htm>



- 525 37. Accorsi EK, Britton A, Fleming-Dutra KE, Smith ZR, Shang N, Derado G, et al. Association  
526 Between 3 Doses of mRNA COVID-19 Vaccine and Symptomatic Infection Caused by the  
527 SARS-CoV-2 Omicron and Delta Variants. *JAMA*. 2022 Feb 15;327(7):639–51.
- 528 38. Lo A, Arolas HP i, Renshon J, Liang S. The polarization of politics and public opinion and  
529 their effects on racial inequality in COVID mortality. *PLOS ONE*. 2022 Sep  
530 15;17(9):e0274580.
- 531 39. Johnson A, Keating D. Whites now more likely to die from covid than Blacks: Why the  
532 pandemic shifted. *Washington Post* [Internet]. 2022 Oct 19 [cited 2022 Nov 15]; Available  
533 from: <https://www.washingtonpost.com/health/2022/10/19/covid-deaths-us-race/>
- 534 40. Stoto MA, Rothwell C, Lichtveld M, Wynia MK. A National Framework to Improve  
535 Mortality, Morbidity, and Disparities Data for COVID-19 and Other Large-Scale Disasters.  
536 *Am J Public Health*. 2021 Jul 1;111(S2):S93–100.
- 537 41. Murray S, Croci R, Wachter R. Is a patient hospitalized ‘with’ covid or ‘for’ covid? It can be  
538 hard to tell. *Washington Post* [Internet]. 2022 Jan 7 [cited 2022 Nov 15]; Available from:  
539 [https://www.washingtonpost.com/outlook/2022/01/07/hospitalization-covid-statistics-](https://www.washingtonpost.com/outlook/2022/01/07/hospitalization-covid-statistics-incident/)  
540 [incidental/](https://www.washingtonpost.com/outlook/2022/01/07/hospitalization-covid-statistics-incidental/)
- 541 42. Money L, Lin R, Reyes E. Hospitals see big jumps in COVID-19 patients, but this surge is  
542 different from last winter. *Los Angeles Times* [Internet]. 2022 Jan 4 [cited 2022 Nov 15];  
543 Available from: [https://www.latimes.com/california/story/2022-01-04/covid-](https://www.latimes.com/california/story/2022-01-04/covid-hospitalizations-top-summer-surge-in-l-a)  
544 [hospitalizations-top-summer-surge-in-l-a](https://www.latimes.com/california/story/2022-01-04/covid-hospitalizations-top-summer-surge-in-l-a)
- 545 43. Boot M. New York has flattened its curve. The Sun Belt has been flattened by it.  
546 *Washington Post* [Internet]. 2020 Jul 27 [cited 2022 Nov 15]; Available from:

- 547 <https://www.washingtonpost.com/opinions/2020/07/27/new-york-has-flattened-its-curve->  
548 [sun-belt-has-been-flattened-by-it/](https://www.washingtonpost.com/opinions/2020/07/27/new-york-has-flattened-its-curve-sun-belt-has-been-flattened-by-it/)
- 549 44. Milligan S. Revenge of the Red States. US News [Internet]. 2022 Jul 17 [cited 2022 Nov  
550 15]; Available from: [https://www.usnews.com/news/elections/articles/2020-07-](https://www.usnews.com/news/elections/articles/2020-07-17/coronavirus-prompts-red-states-to-revolt-against-trump)  
551 [17/coronavirus-prompts-red-states-to-revolt-against-trump](https://www.usnews.com/news/elections/articles/2020-07-17/coronavirus-prompts-red-states-to-revolt-against-trump)
- 552 45. Krieger N, Testa C, Chen JT, Hanage WP, McGregor AJ. Relationship of political ideology  
553 of US federal and state elected officials and key COVID pandemic outcomes following  
554 vaccine rollout to adults: April 2021–March 2022. Lancet Reg Health – Am [Internet]. 2022  
555 Dec 1 [cited 2022 Nov 15];16. Available from:  
556 [https://www.thelancet.com/journals/lanam/article/PIIS2667-193X\(22\)00201-0/fulltext](https://www.thelancet.com/journals/lanam/article/PIIS2667-193X(22)00201-0/fulltext)
- 557 46. Putnam R, Garrett S, Gounder C. America Can Rebuild Our Communities Before the Next  
558 Pandemic | Time. TIME [Internet]. 2022 Jan 11 [cited 2022 Nov 15]; Available from:  
559 <https://time.com/6138465/covid-19-immunity-community/>
- 560 47. Borgonovi F, Andrieu E, Subramanian SV. The evolution of the association between  
561 community level social capital and COVID-19 deaths and hospitalizations in the United  
562 States. Soc Sci Med 1982. 2021 Jun;278:113948.
- 563 48. Woolf SH. The Growing Influence of State Governments on Population Health in the United  
564 States. JAMA. 2022 Apr 12;327(14):1331–2.
- 565 49. Paglino E, Lundberg DJ, Cho A, Wasserman JA, Raquib R, Luck AN, et al. Excess all-cause  
566 mortality across counties in the United States, March 2020 to December 2021. MedRxiv  
567 Prepr Serv Health Sci. 2022 May 17;2022.04.23.22274192.
- 568 50. Lundberg DJ, Cho A, Raquib R, Nsoesie EO, Wrigley-Field E, Stokes AC. Geographic and  
569 Temporal Patterns in Covid-19 Mortality by Race and Ethnicity in the United States from

- 570 March 2020 to February 2022. MedRxiv Prepr Serv Health Sci. 2022 Jul  
571 21;2022.07.20.22277872.
- 572 51. Sehgal NJ, Yue D, Pope E, Wang RH, Roby DH. The Association Between COVID-19  
573 Mortality And The County-Level Partisan Divide In The United States. Health Aff  
574 (Millwood). 2022 Jun;41(6):853–63.
- 575 52. National Academies of Sciences E. A Framework for Assessing Mortality and Morbidity  
576 After Large-Scale Disasters [Internet]. 2020 [cited 2022 Dec 11]. Available from:  
577 [https://nap.nationalacademies.org/catalog/25863/a-framework-for-assessing-mortality-and-](https://nap.nationalacademies.org/catalog/25863/a-framework-for-assessing-mortality-and-morbidity-after-large-scale-disasters)  
578 [morbidity-after-large-scale-disasters](https://nap.nationalacademies.org/catalog/25863/a-framework-for-assessing-mortality-and-morbidity-after-large-scale-disasters)
- 579 53. Anthes E. Many Virus Cases Go Uncounted. Are There Better Ways to Track the Pandemic?  
580 The New York Times [Internet]. 2022 Apr 14 [cited 2022 Nov 15]; Available from:  
581 <https://www.nytimes.com/2022/04/14/health/covid-cases-tracking.html>  
582

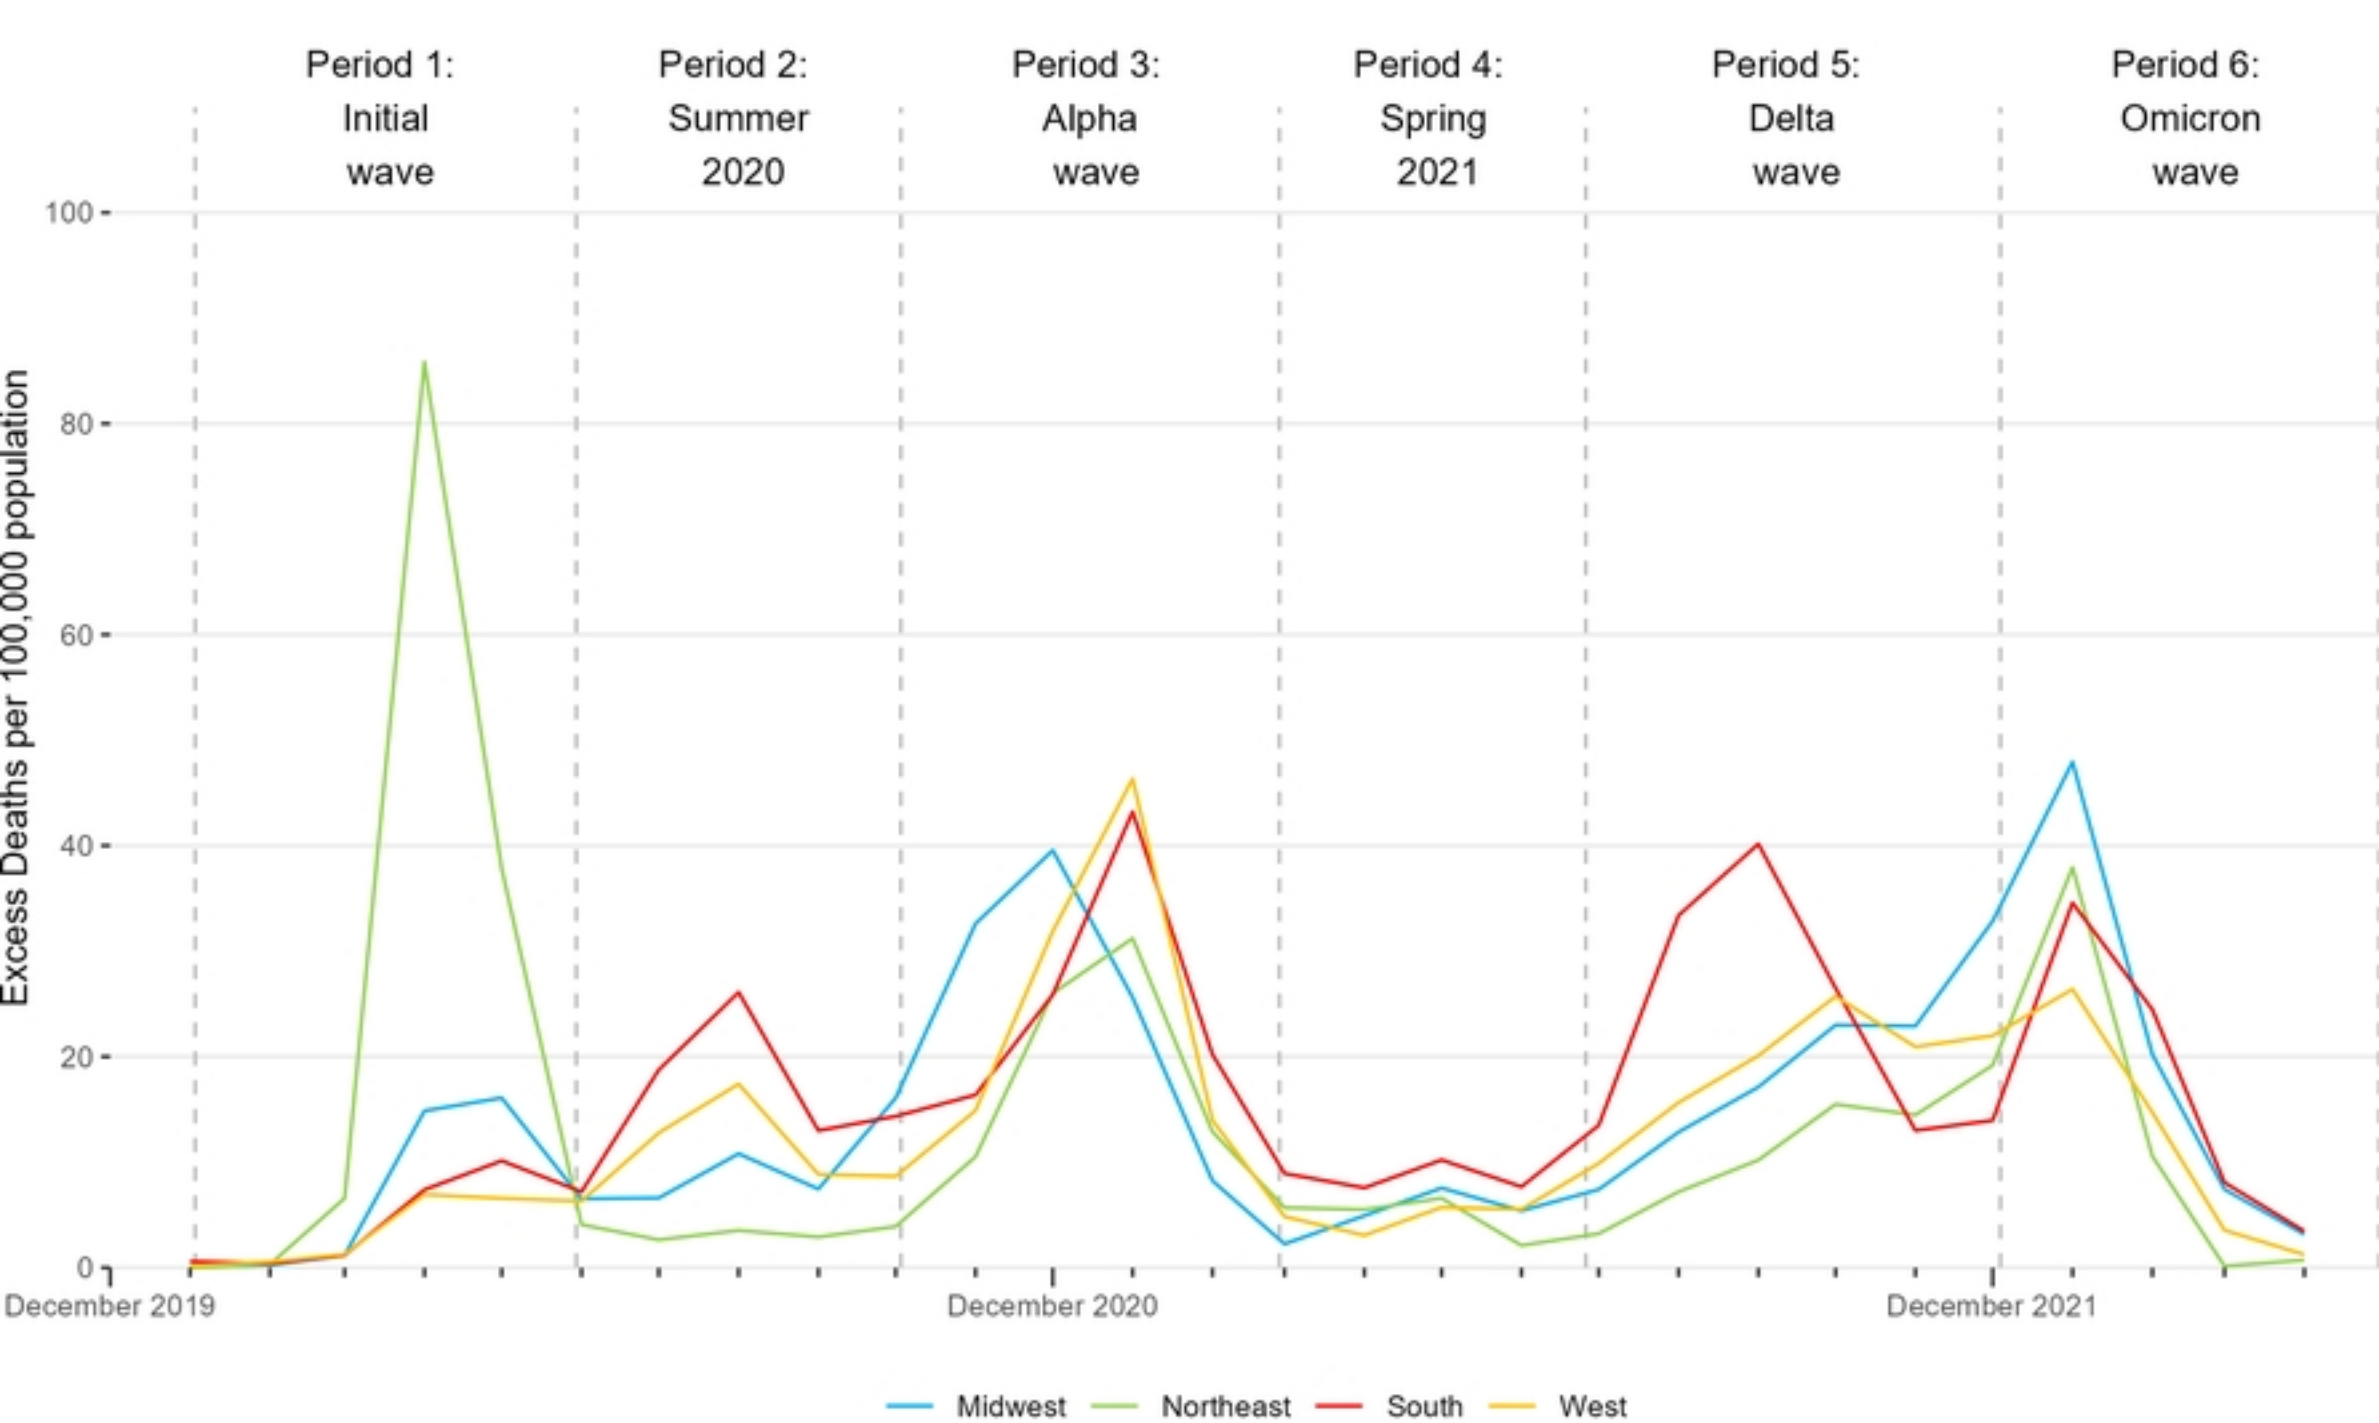

Figure 1

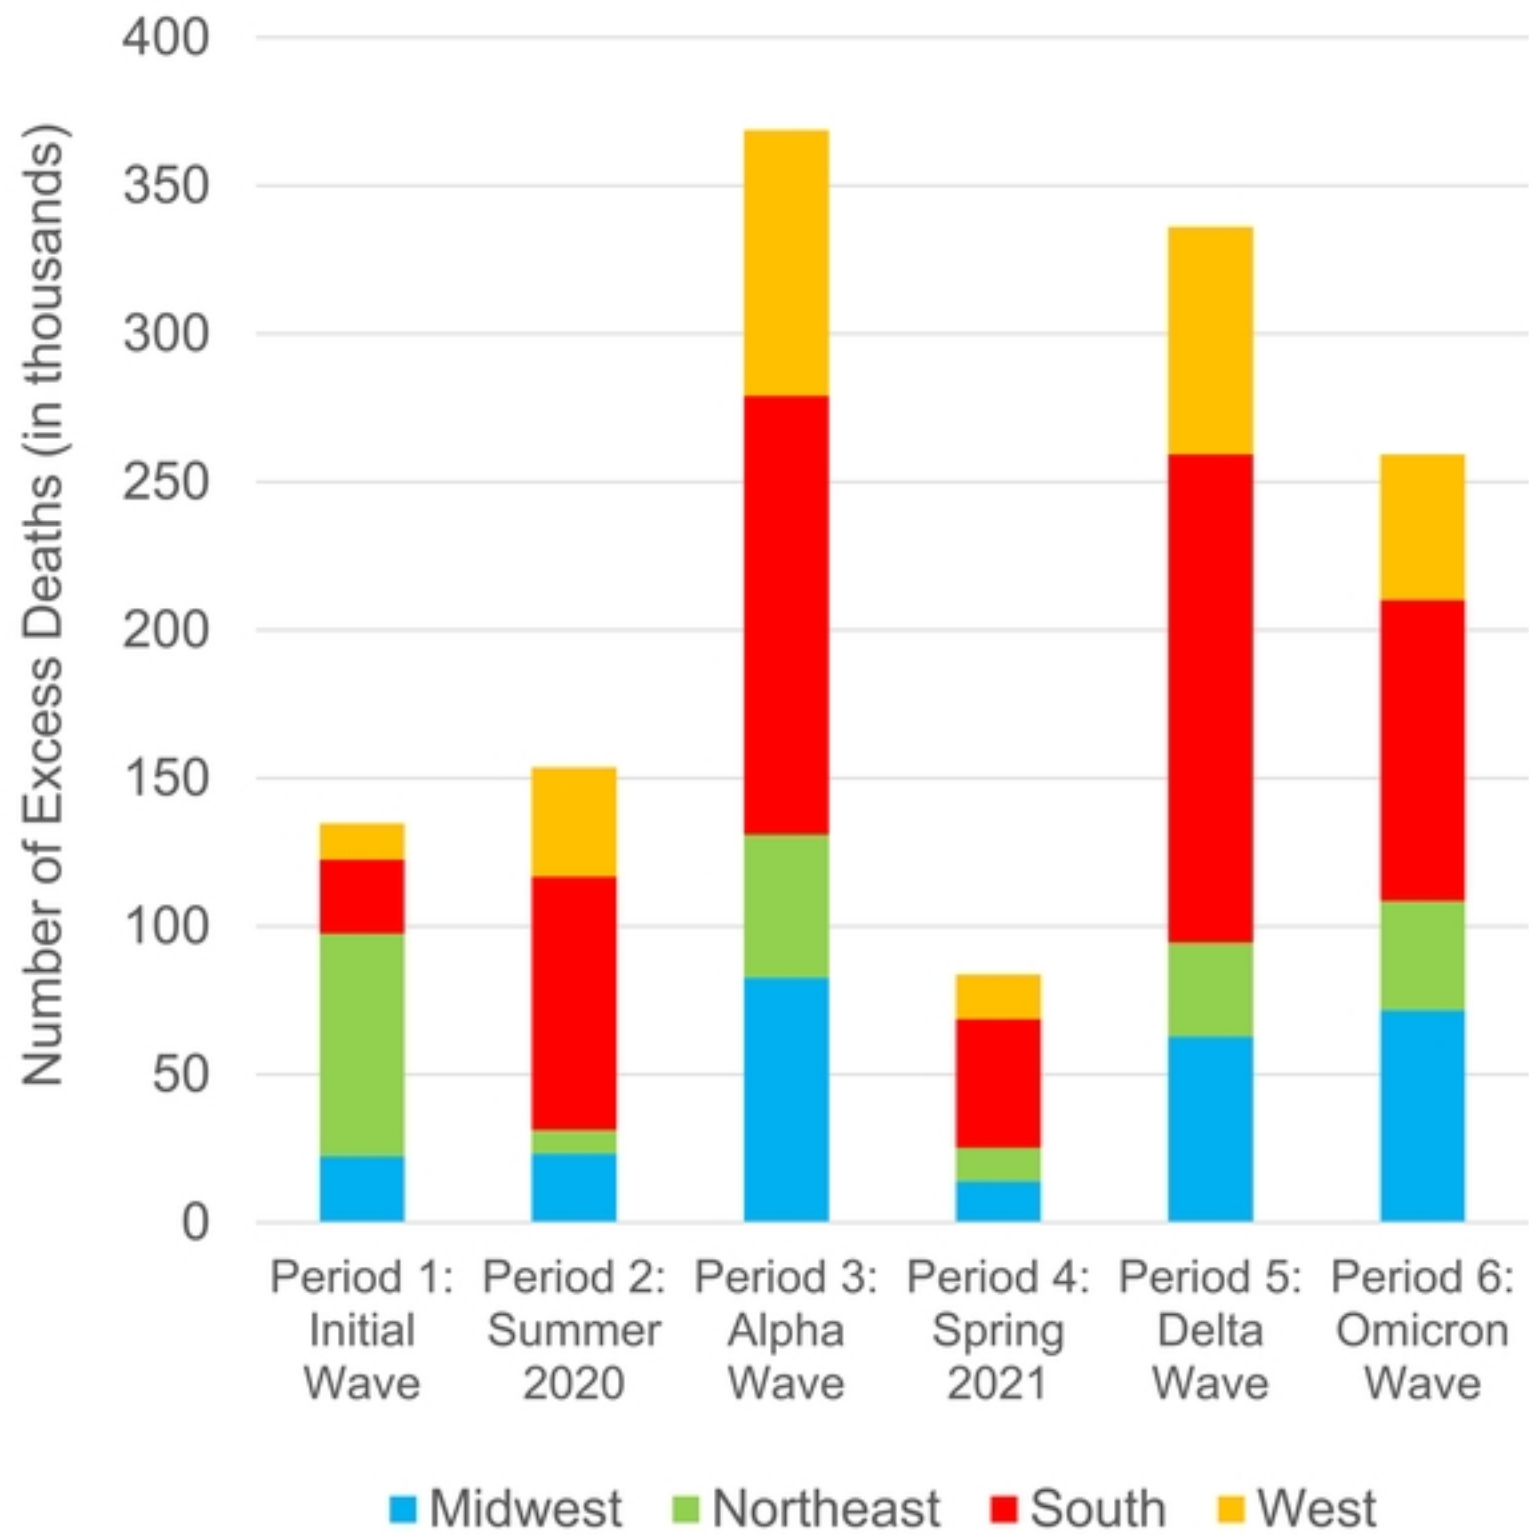

Figure 2

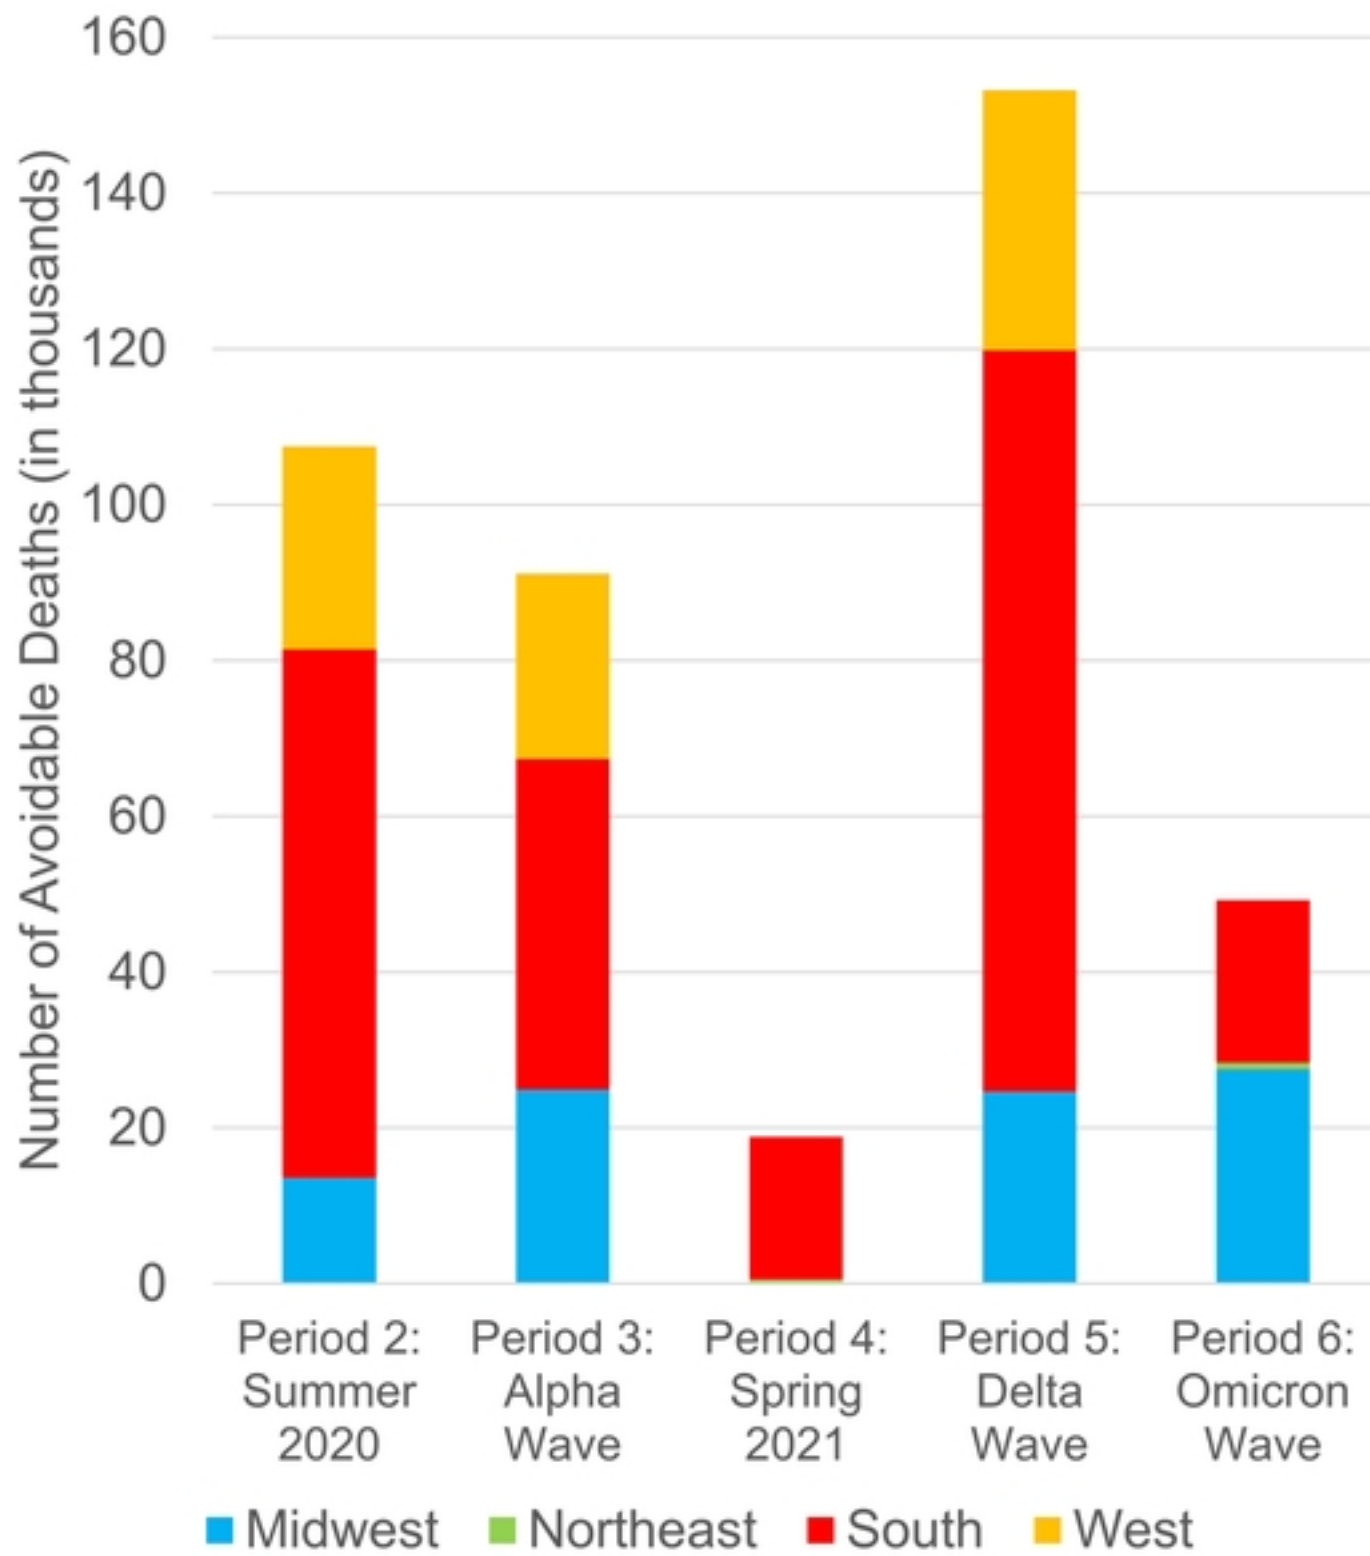

Figure 3

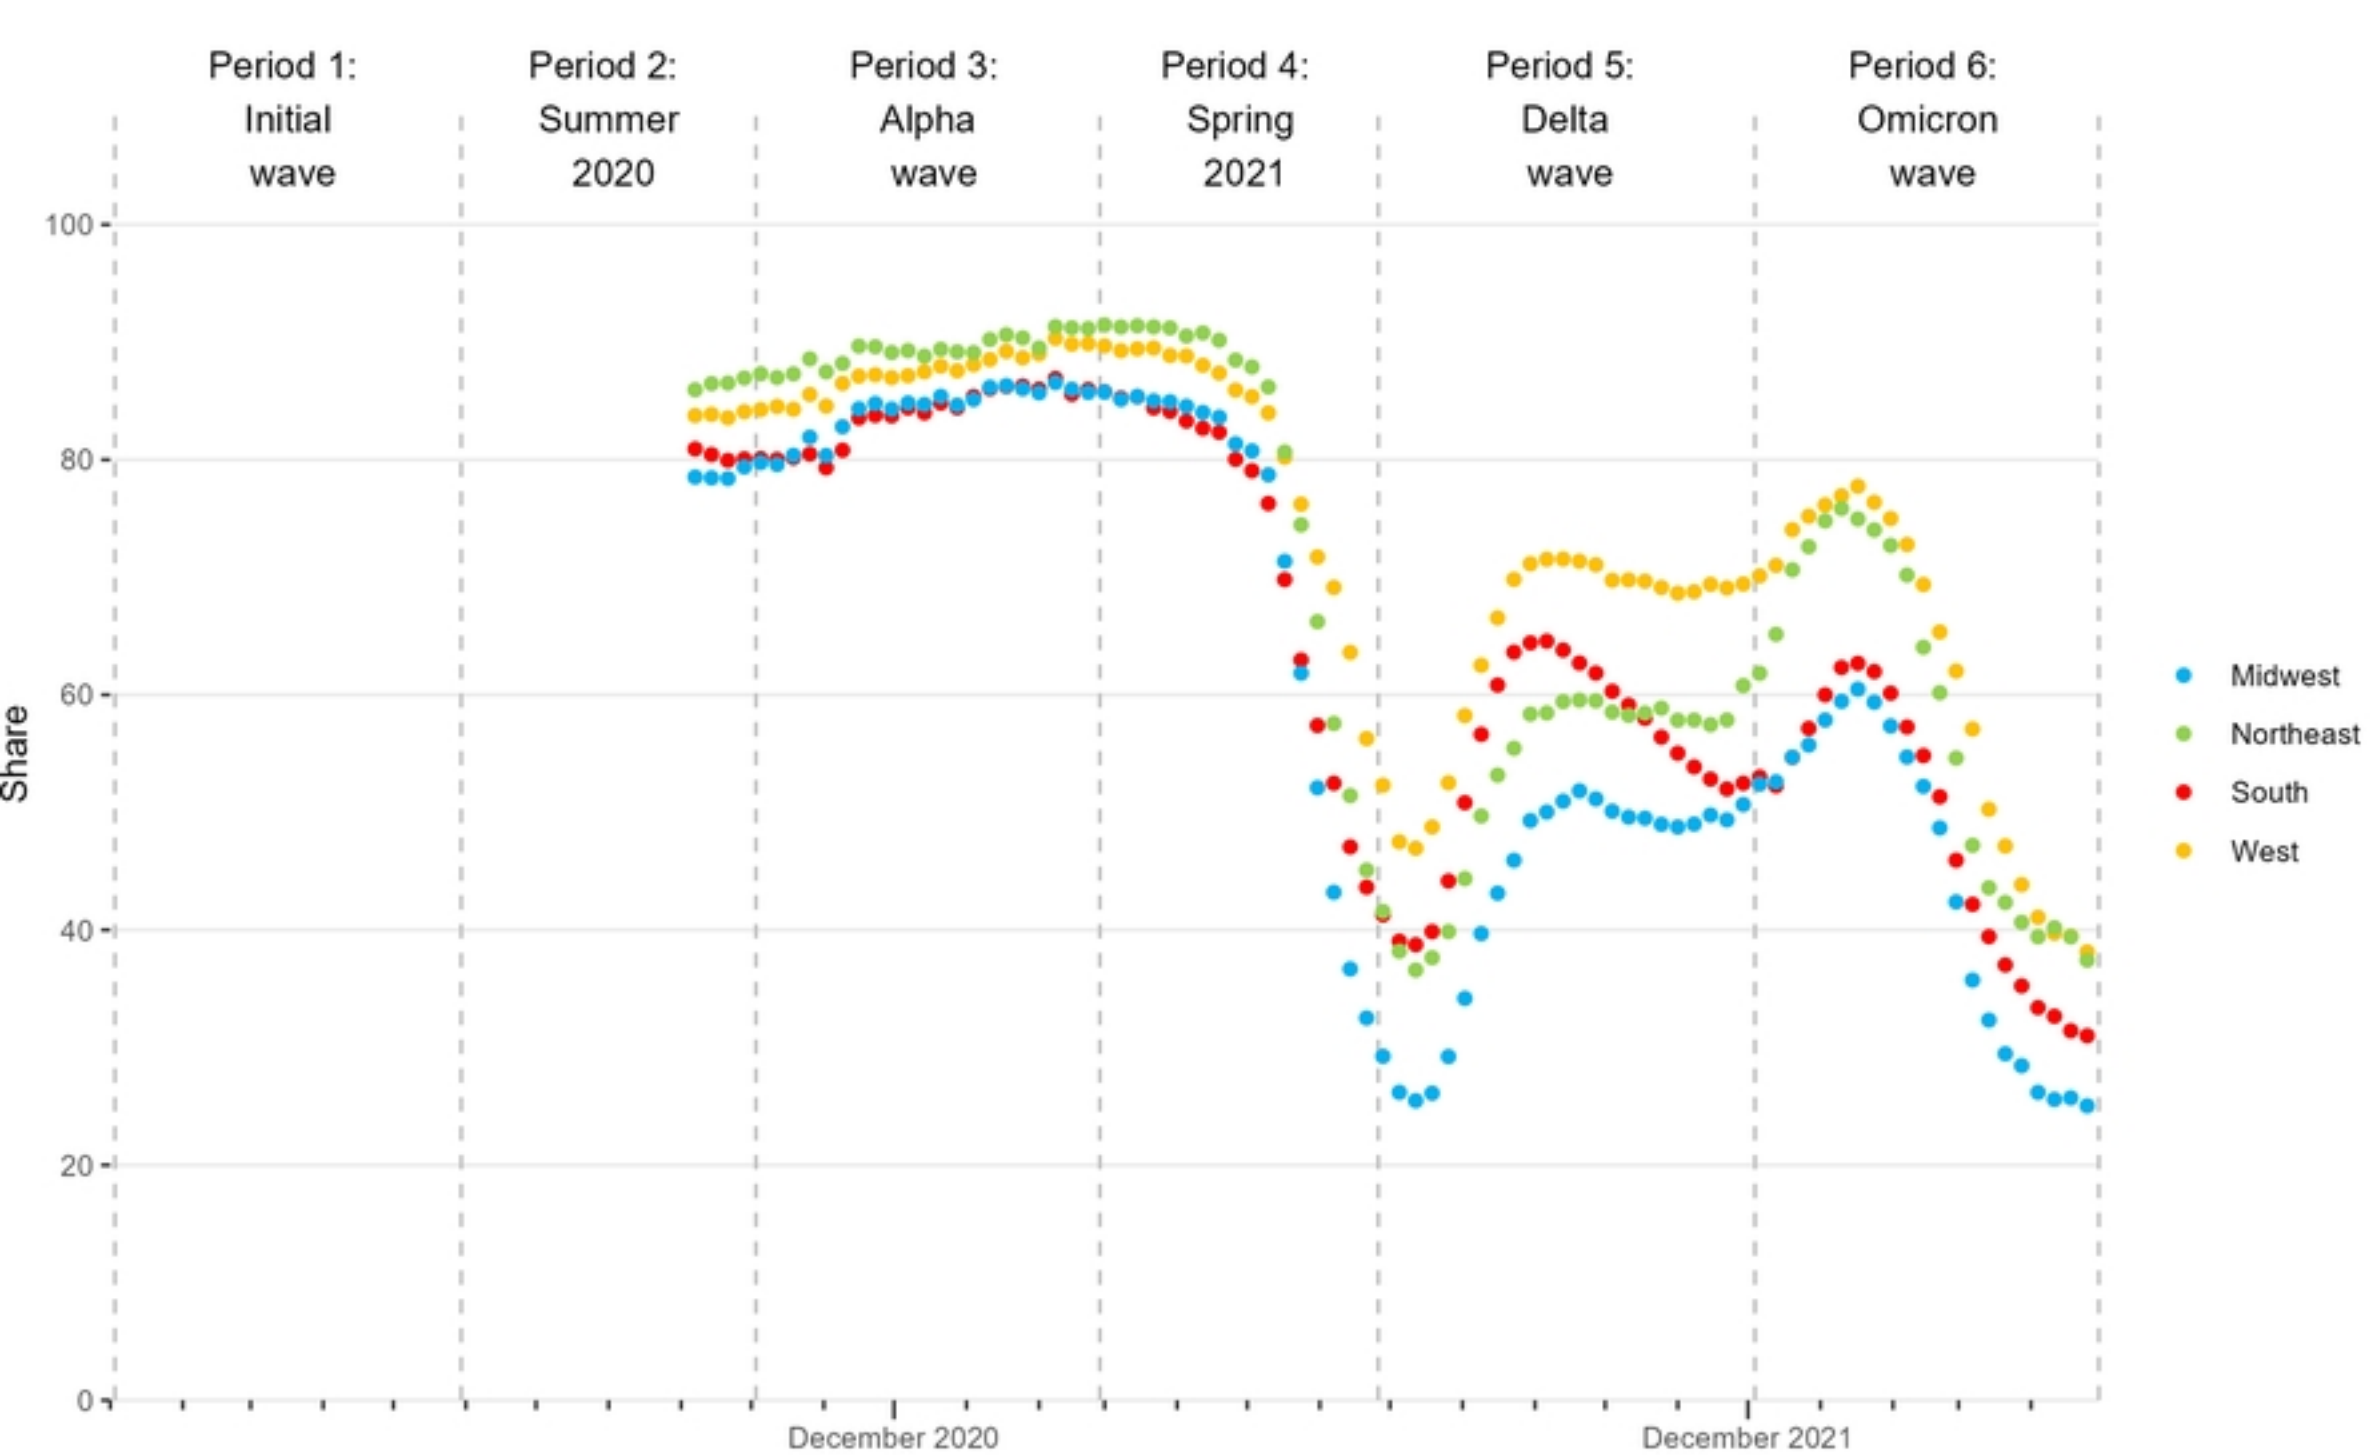

Figure 4

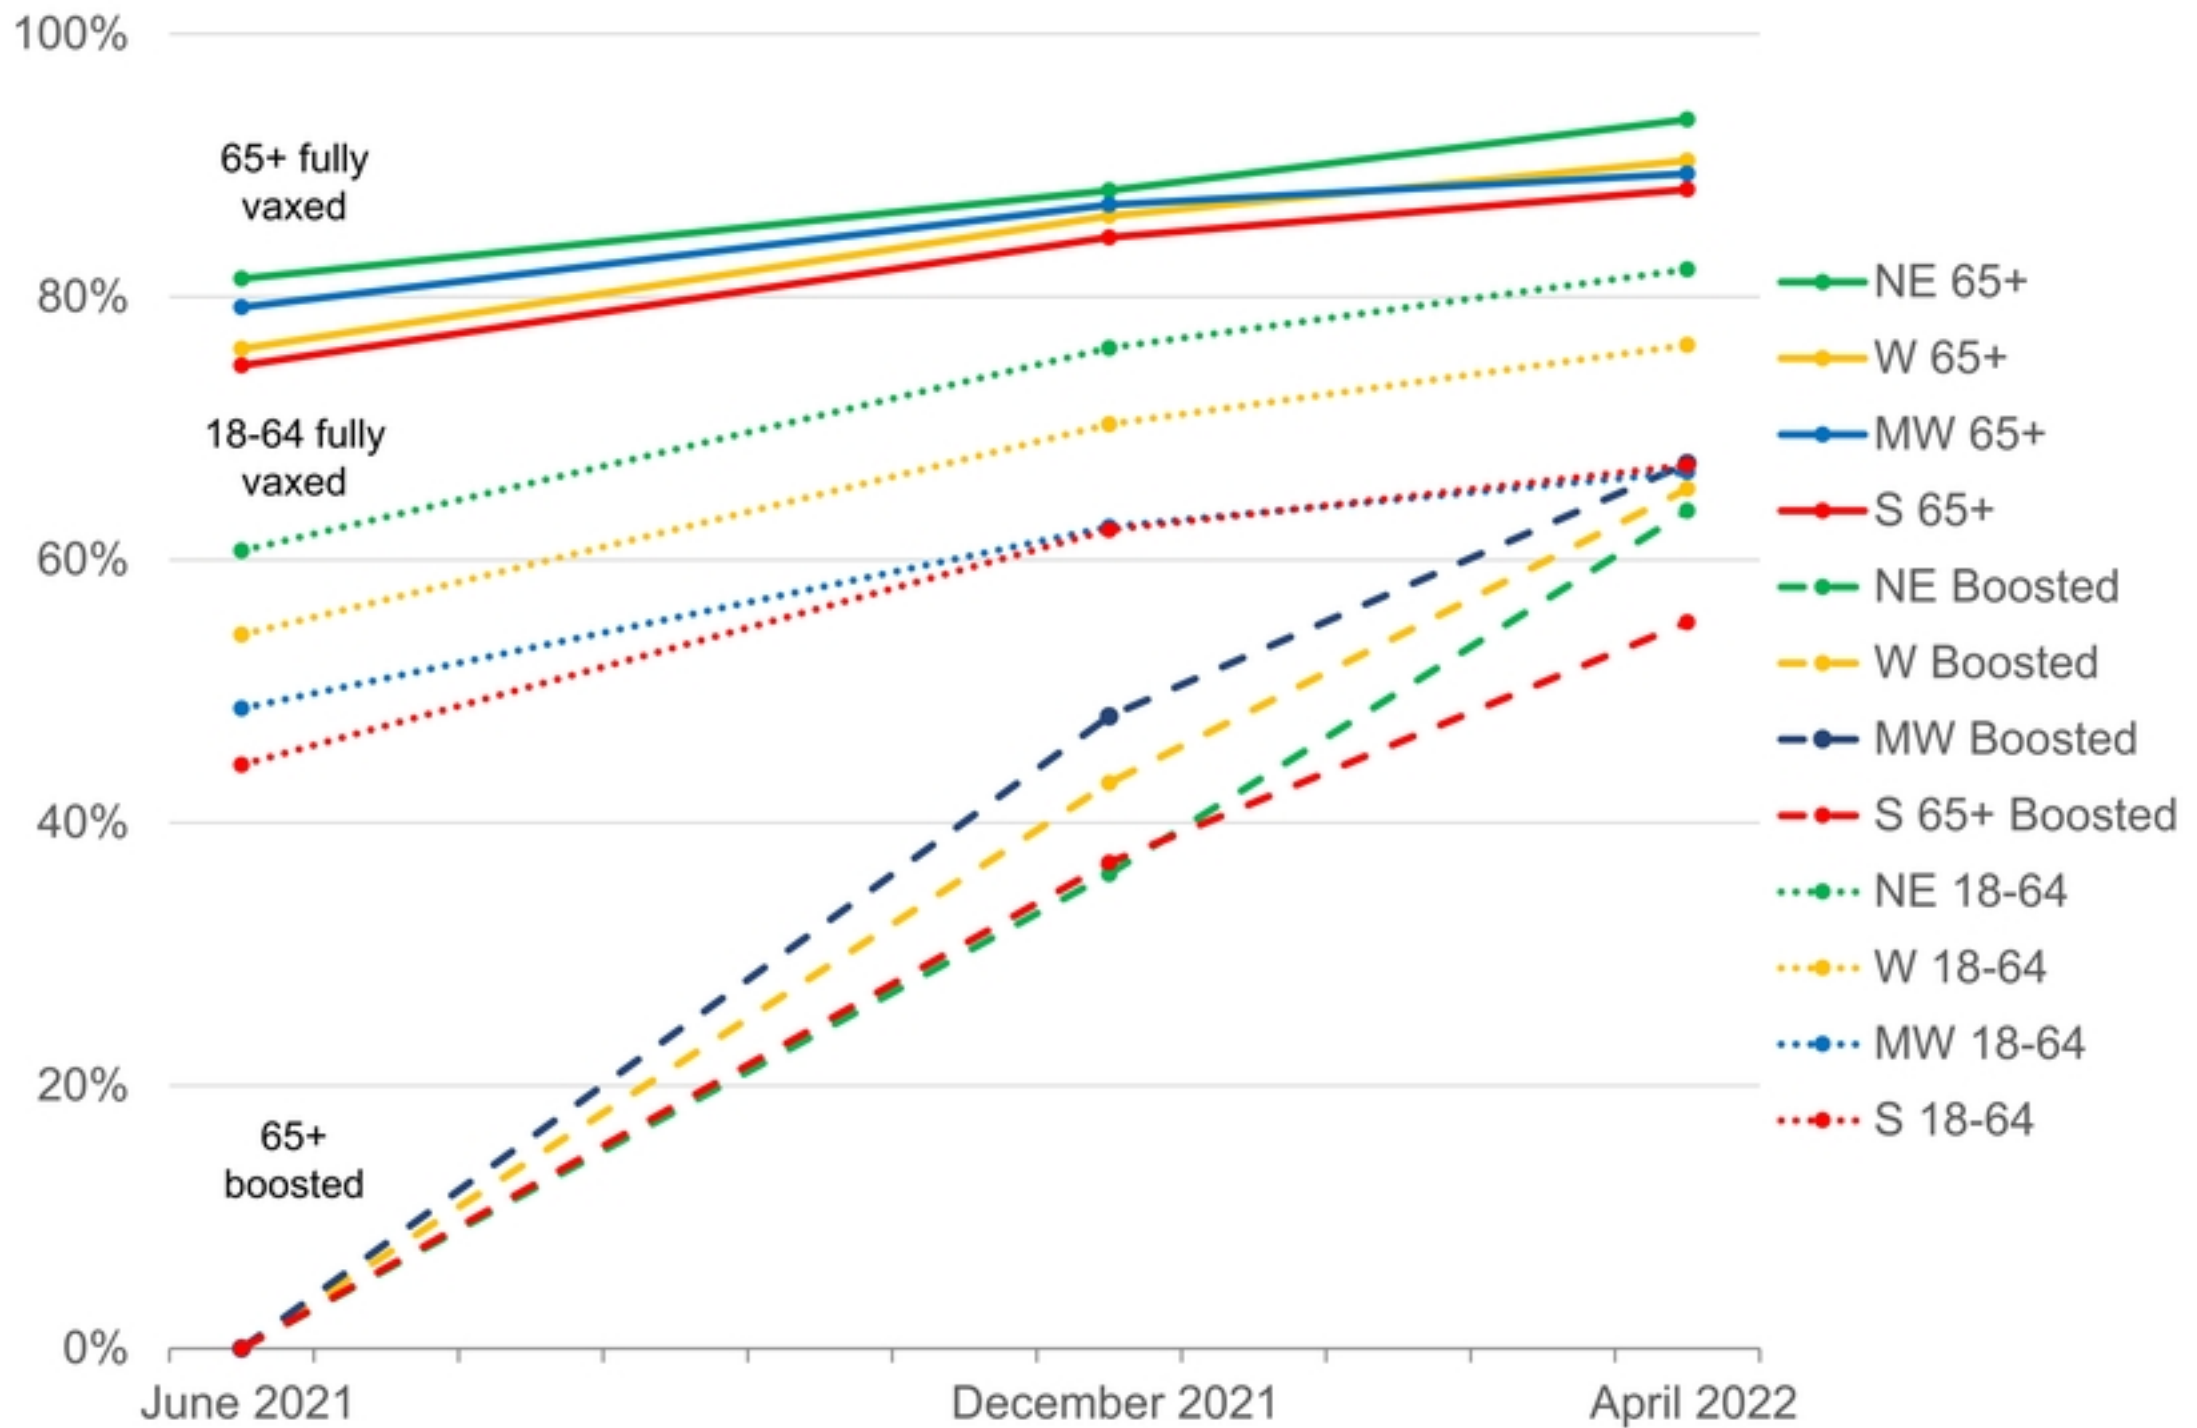

Figure 5
